# Supplementary material for: Comprehensive de novo mutation discovery with HiFi long-read sequencing
Source: Springer Nature journal article supplement (doi:10.1186/s13073-023-01183-6), 2023-05-08
Supplement: MOESM1 [file 13073_2023_1183_MOESM1_ESM.pdf]

## **Additional file 1**

### **Supplement to:**

### **Comprehensive *de novo* mutation discovery with HiFi long-read sequencing**

Erdi Kucuk<sup>1,2\*</sup>, Bart P.G.H. van der Sanden<sup>1,3\*</sup>, Luke O’Gorman<sup>1</sup>, Michael Kwint<sup>1</sup>, Ronny Derks<sup>1</sup>, Aaron M. Wenger<sup>4</sup>, Christine Lambert<sup>4</sup>, Shreyasee Chakraborty<sup>4</sup>, Primo Baybayan<sup>4</sup>, William J. Rowell<sup>4</sup>, Han G. Brunner<sup>1,3,5,6</sup>, Lisenka E.L.M. Vissers<sup>1,3</sup>, Alexander Hoischen<sup>1,2,7,\*</sup>, Christian Gilissen<sup>1,2,\*</sup>

<sup>1</sup>Department of Human Genetics, Radboud University Medical Center, Nijmegen, The Netherlands

<sup>2</sup>Radboud Institute for Molecular Life Sciences, Radboud University Medical Center, Nijmegen, The Netherlands

<sup>3</sup>Donders Institute for Brain, Cognition and Behaviour, Radboud University Medical Center, Nijmegen, The Netherlands

<sup>4</sup>Pacific Biosciences, Menlo Park, CA, USA

<sup>5</sup>Department of Clinical Genetics, Maastricht University Medical Center, Maastricht, The Netherlands

<sup>6</sup>GROW School for Oncology and Developmental Biology, Maastricht University Medical Center, Maastricht, The Netherlands

<sup>7</sup>Radboud University Medical Center for Infectious Diseases (RCI), Department of Internal Medicine, Radboud University Medical Center, Nijmegen, the Netherlands

\*These authors contributed equally

#### Corresponding authors:

Christian Gilissen, PhD

Email: [christian.gilissen@radboudumc.nl](mailto:christian.gilissen@radboudumc.nl)

Alexander Hoischen, PhD

Email: [alexander.hoischen@radboudumc.nl](mailto:alexander.hoischen@radboudumc.nl)

Radboudumc, Department of Human Genetics  
PO Box 9101, 6500 HB  
Nijmegen, the Netherlands

## Best practices

In order to get the best results for the comprehensive detection of *de novo* mutations using PacBio HiFi long-read sequencing we advise to:

- Apply coverage filters to increase accuracy for substitutions and small indels
- Remove clustered substitutions and small indels to reduce the number of false positive calls
- Phase mutations to get insight in the quality of the variant call
- Perform a visual inspection to assess small DNM quality and prioritize validations
- Apply quality filters for the detection of STRs

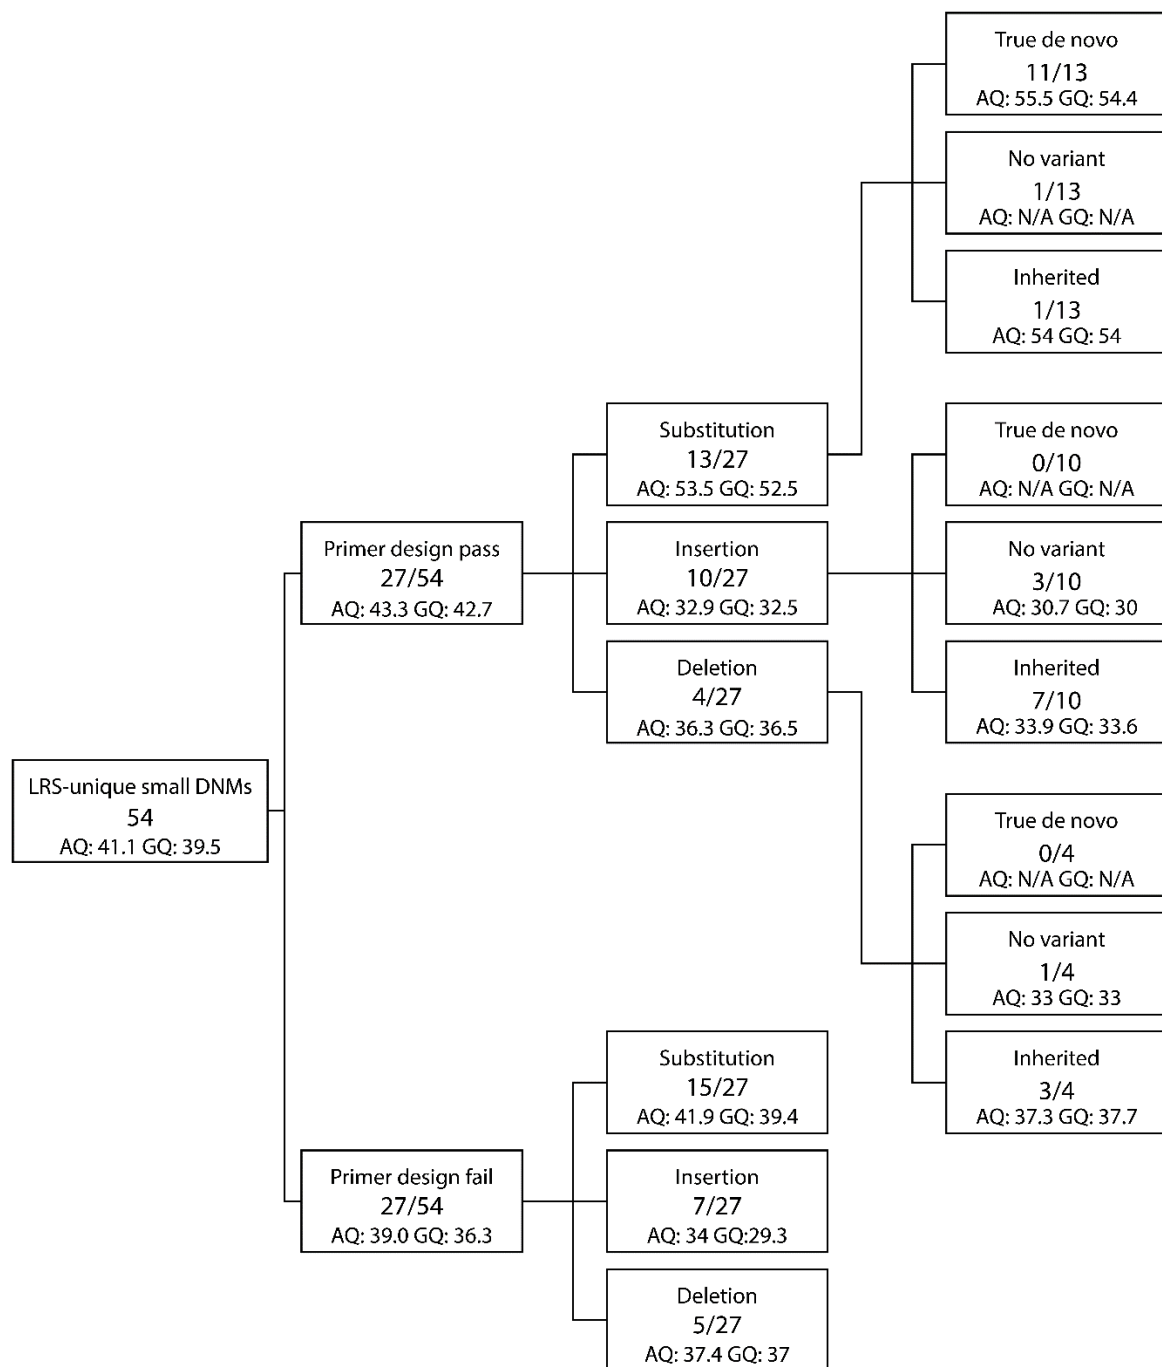

**Fig. S1: Overview of validated LRS-unique small *de novo* mutation calls**

This figure shows the distribution of substitutions, insertions and deletions in the successful and unsuccessful validation group. For the small DNMs with successful Sanger validation also the validation status is presented per variant type. In addition, for all groups the allele quality (AQ) reflecting the quality of the alternate allele and genotype quality (GQ) reflecting the quality of the genotype is shown.

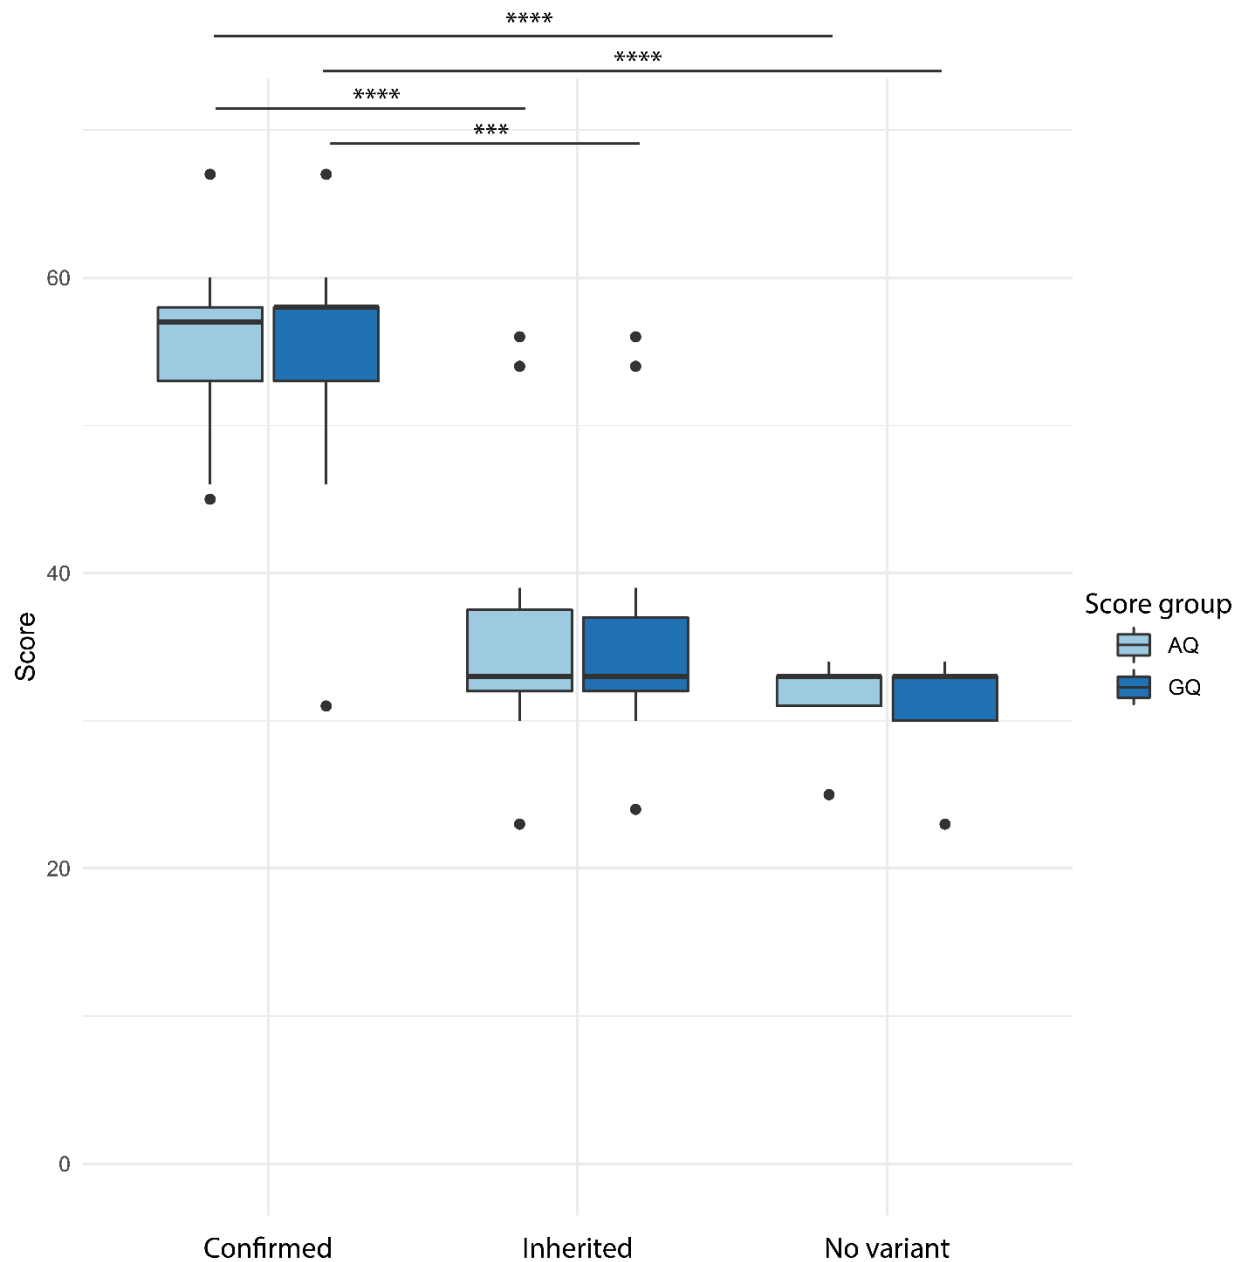

**Fig. S2: LRS quality scores for validated LRS-unique small DNMs**

For each validation category (x-axis) this plot shows the LRS allele quality score (AQ) reflecting the quality of the alternate allele and genotype quality (GQ) reflecting the quality of the genotype on the y-axis. AQ is shown in light blue and GQ is shown in dark blue. Means of the groups were compared using a t-test. P-values are  $P=2.8e-7$ ,  $P=8.2e-6$ ,  $P=8.2e-6$  and  $P=3.0e-4$ . \*\*\*\* means  $P < 0.0001$  and \*\*\* means  $P < 0.001$ .

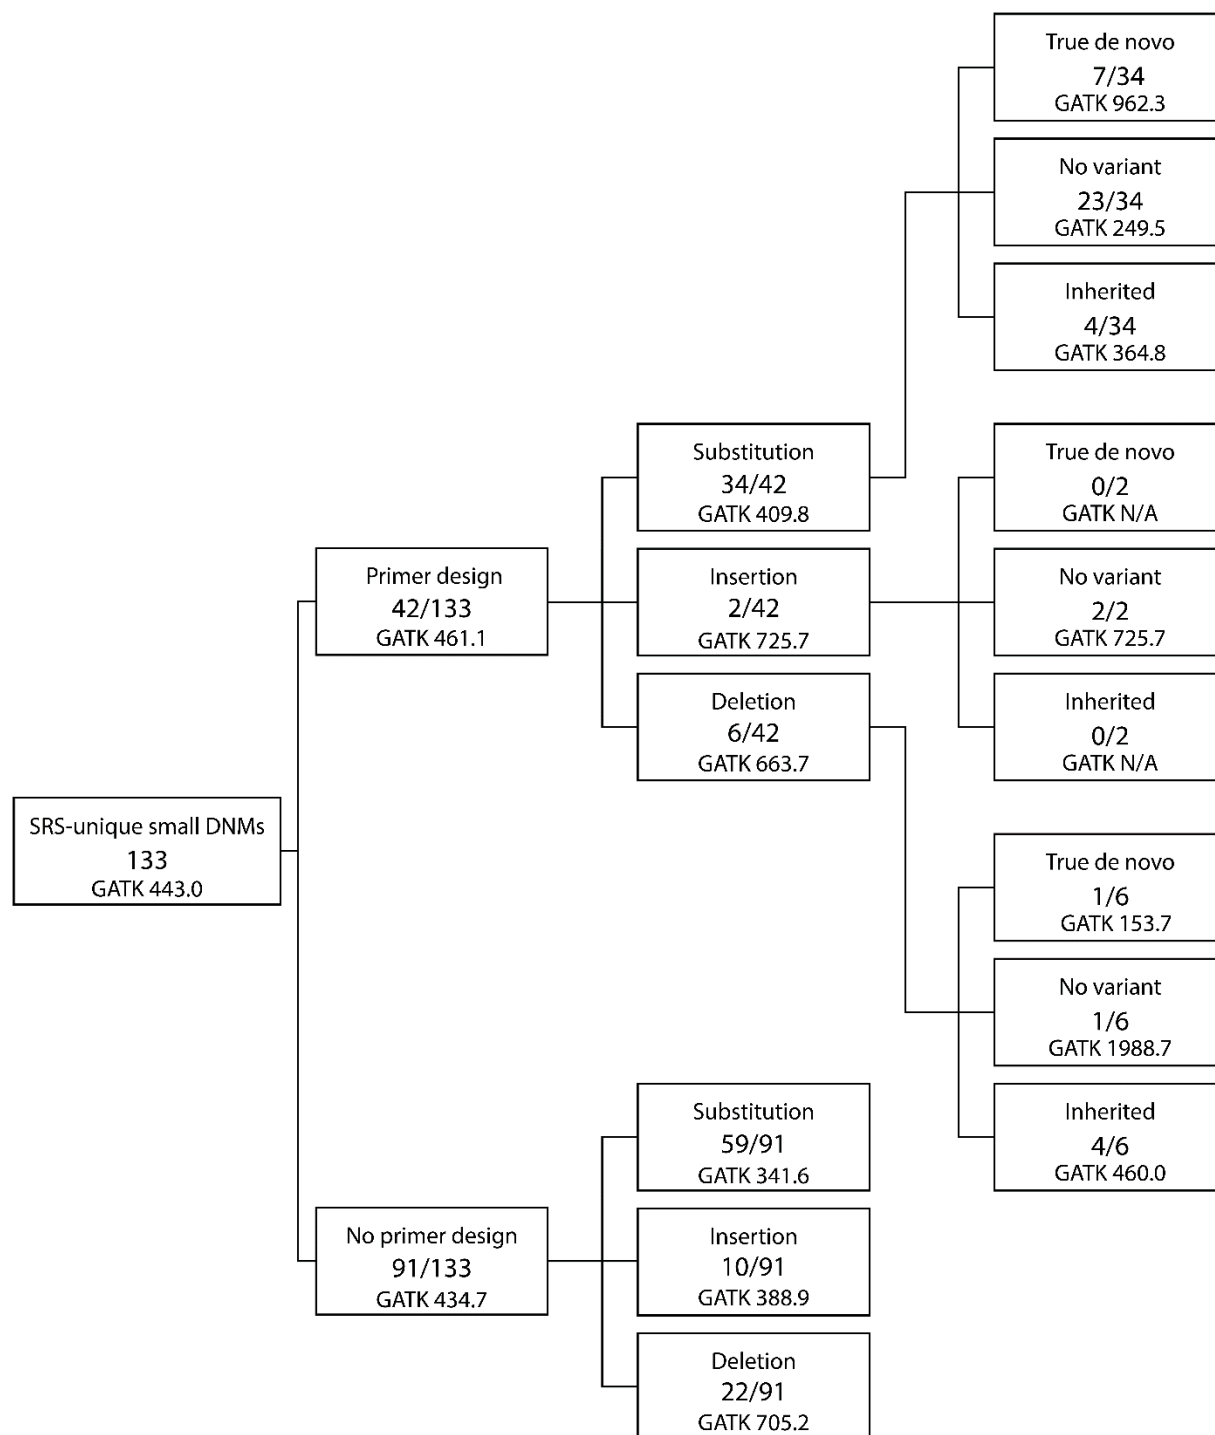

**Fig. S3: Overview of validated SRS small *de novo* mutation calls**

This figure shows the distribution of substitutions, insertions and deletions in the set of DNMs we selected for Sanger validations and the set that was not validated. For the validated DNMs also the validation status is presented per variant type. In addition, for all groups the GATK score is given. For the SRS-unique mutations we also performed visual inspection of the alignment files and only seven of the 133 mutations were considered a high quality DNM.

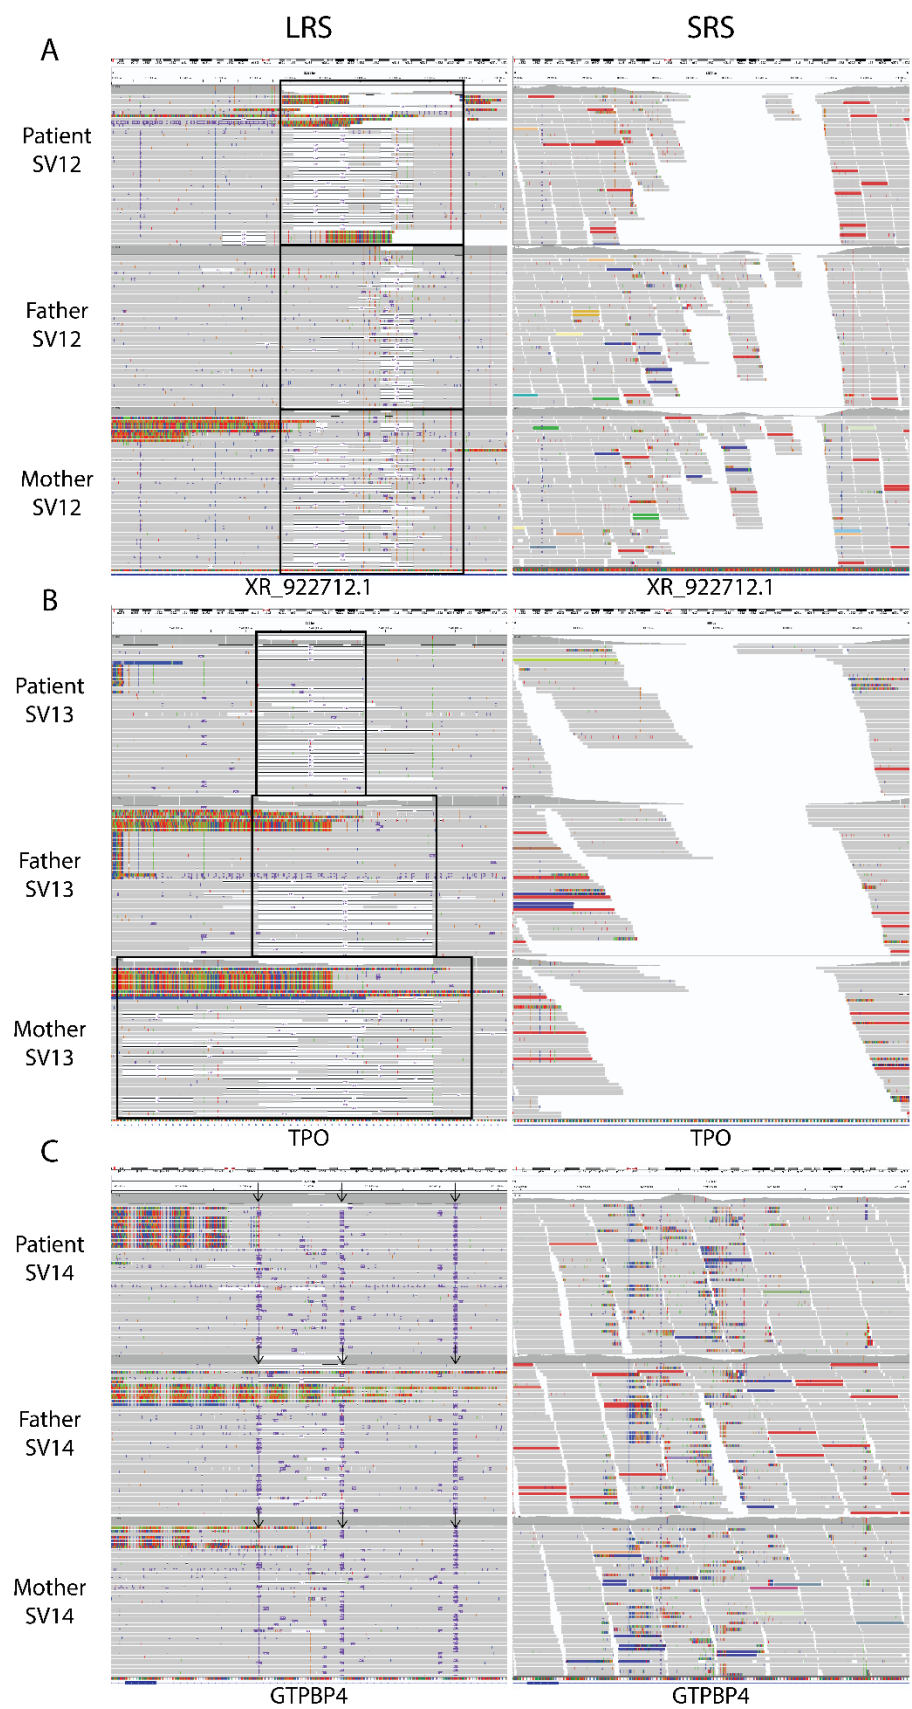

**Fig. S4: likely de novo repeat expansions and contractions.**

Three examples of the eight LRS-unique SVs where one or both of the parents had the same variant but with a different length. (A) SV12 is a 991 bp deletion in *XR\_922712.1*. Also both parents have a deletion at this position, but the size is different. The deletion in LRS is depicted in the boxes. (B) SV13 is a 150 bp deletion in *TPO*. This SV is smaller than the deletion at the same position in both parents. The deletion is again depicted in the boxes. (C) SV14 is a 509 bp insertion in *GTPBP4*. The position of the insertion call in all family members' LRS reads are indicated with a black arrow. For these three SVs the SRS IGV image also indicate an event happening because of the red and blue colored reads. Red reads represent reads with a larger insert size than expected indicating a possible deletion. Blue reads represent reads with a smaller insert size than expected indicating a possible insertion. However, the limited read size with SRS is not sufficient enough to properly call the SV.

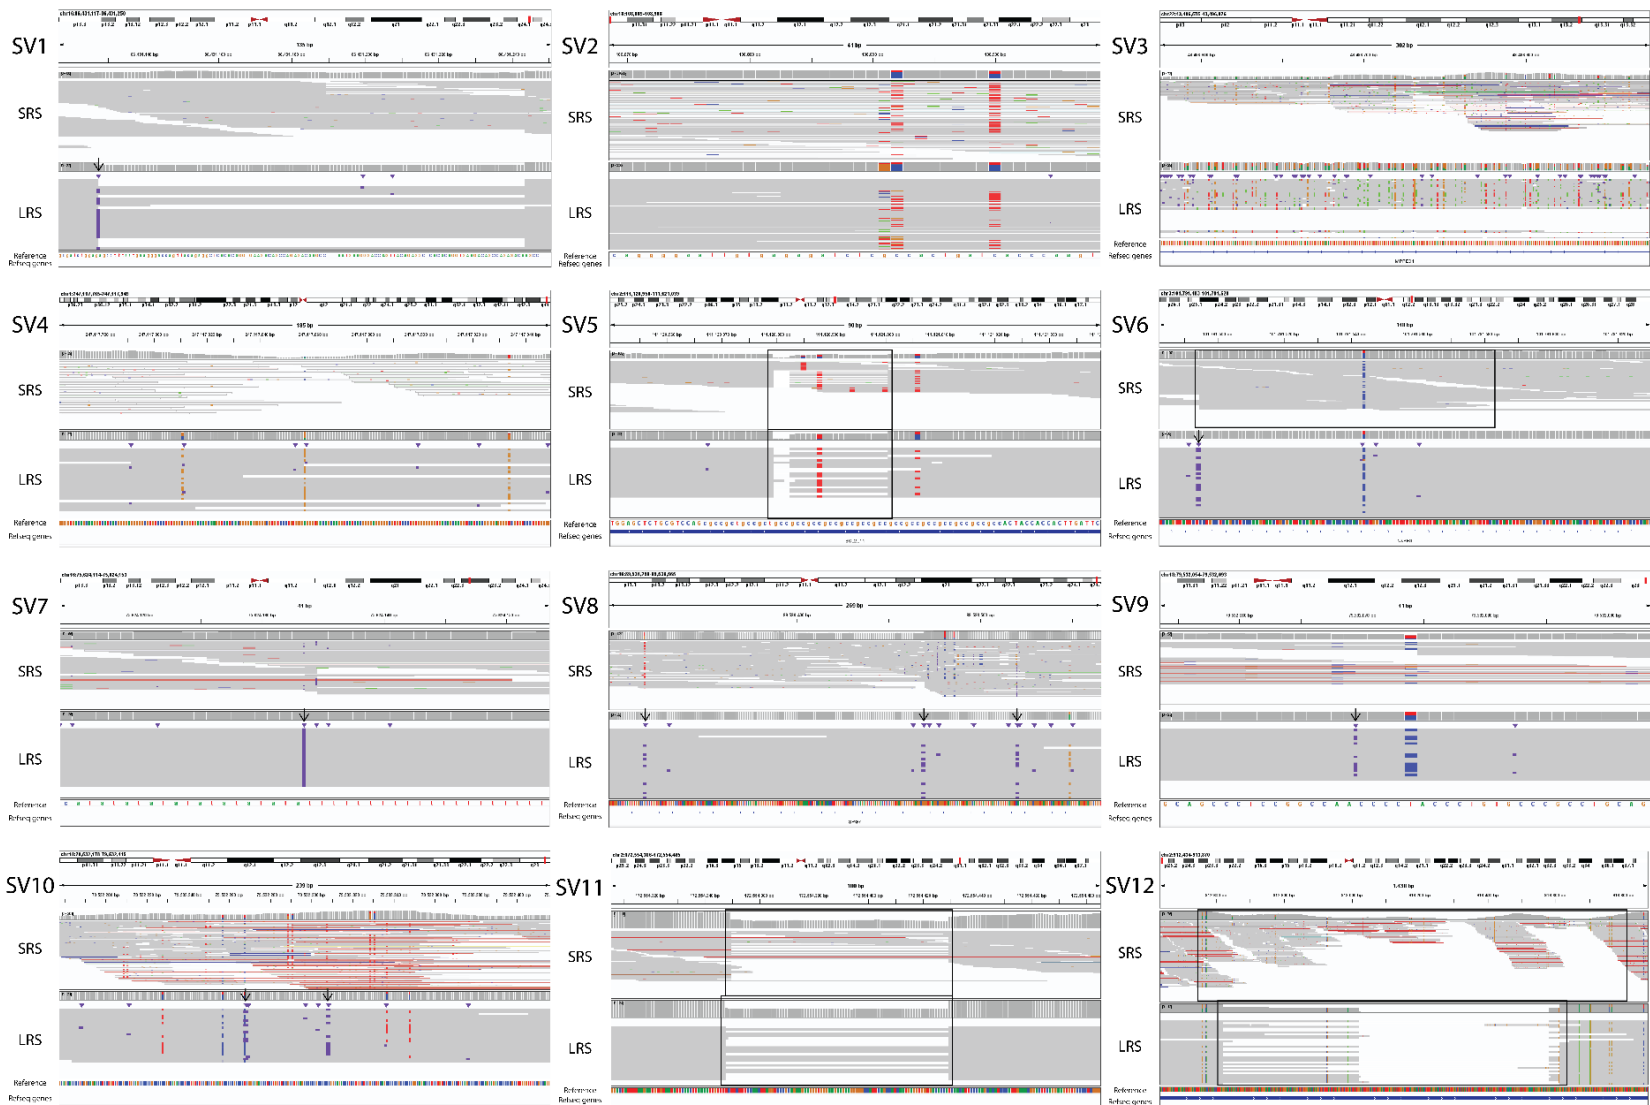

**Fig. S5A:**

Overview of the alignments of SV1-SV12 detected by LRS and SRS. For each SV this figure shows the SRS alignment in the top part and LRS alignment in the bottom part. Black arrows and boxes indicate where the SV is visible in the SRS and/or LRS alignments.



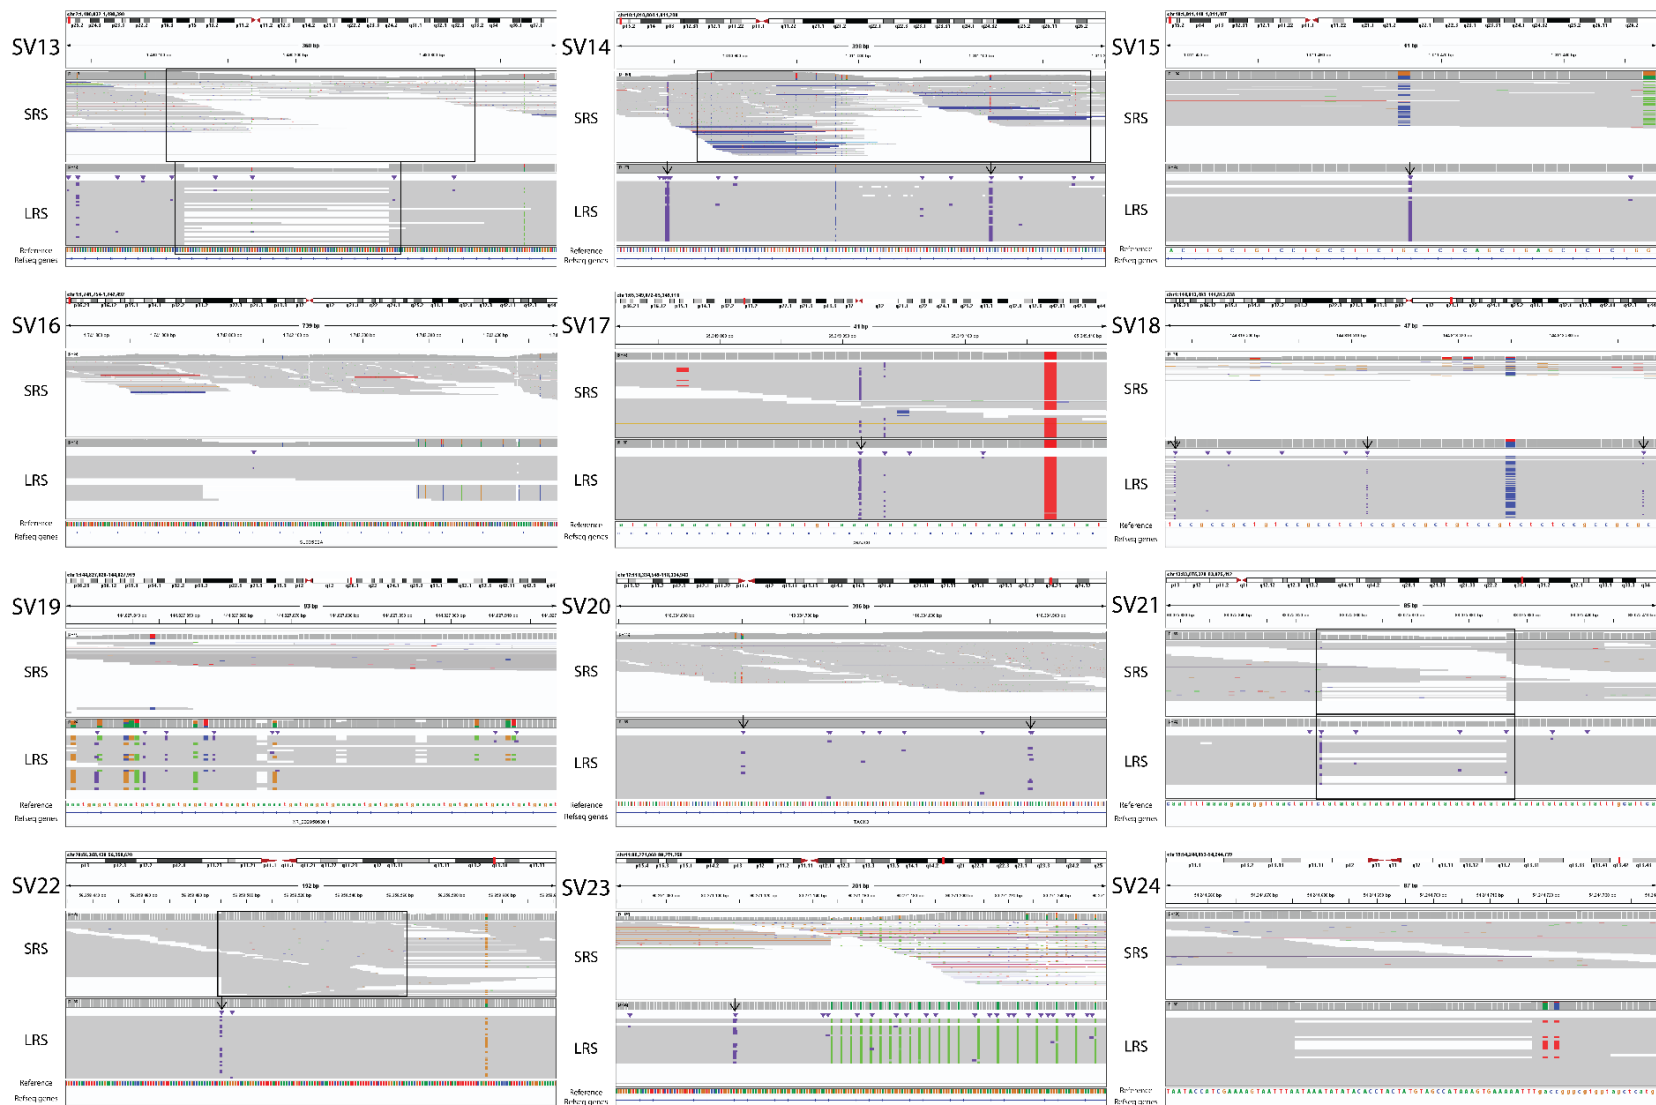

**Fig. S5B:**

Overview of the alignments of SV13-SV24 detected by LRS and SRS. For each SV this figure shows the SRS alignment in the top part and LRS alignment in the bottom part. Black arrows and boxes indicate where the SV is visible in the SRS and/or LRS alignments.

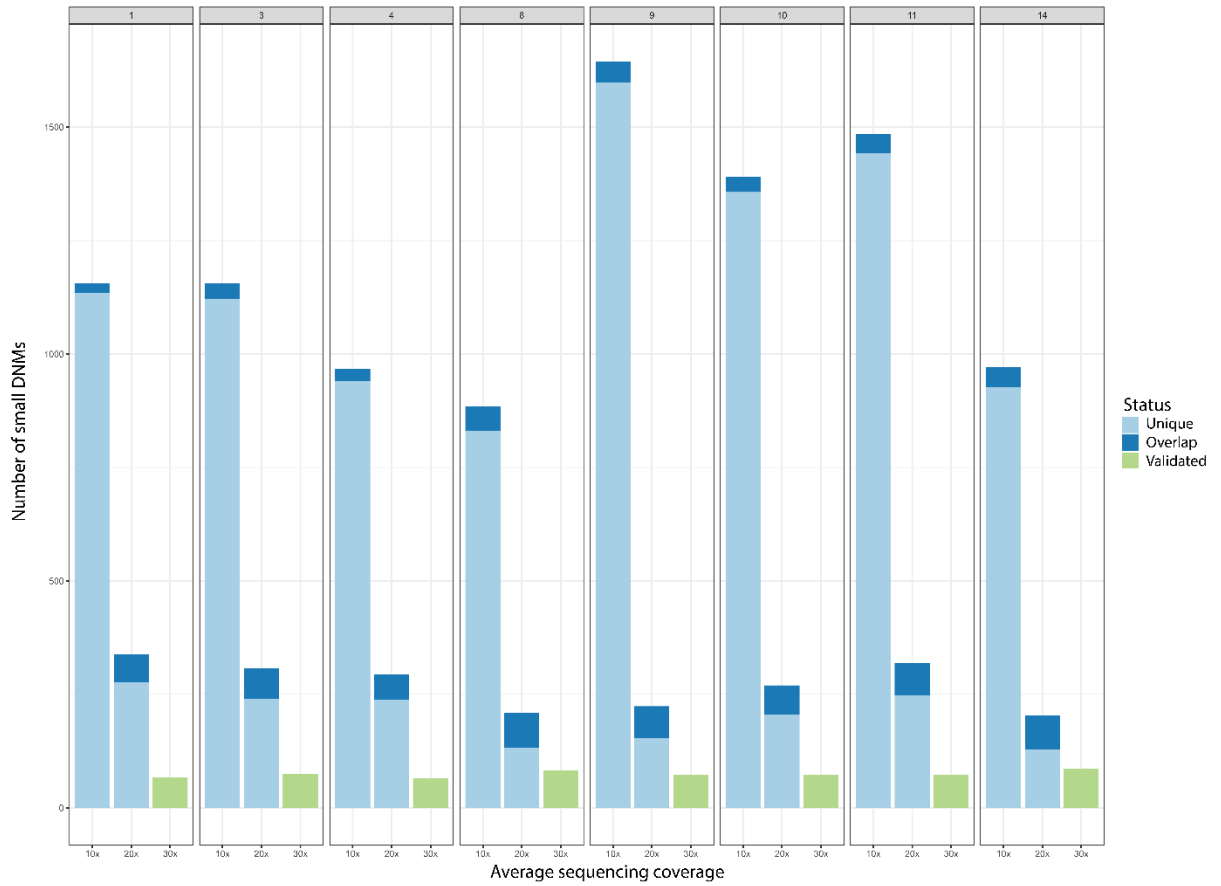

**Fig. S6: Titration results**

Effects of lower coverage on DNM detection for each trio. X-axis shows the coverage level, from average 30x (full) to 20x and 10x. Grey boxes indicate the trio identifier. Colors indicate the DNM status. "Validated" denotes the DNMs that are either detected at the full coverage by both platforms or experimentally validated. Overlap denotes the DNMs that overlap with the validated set; "Unique" denotes the small DNMs that are detected only at that specific coverage.

## Supplementary Tables

**Table S1: Overview of sequenced trios**

From left to right columns indicate the Trio ID, gender of the proband, birth year for the probands, types of microarray analysis that is run on the sample (if any) and number of SMRT cells used for the PacBio LRS run per sample.

| <b>Trio ID</b> | <b>Gender of Child</b> | <b>Year of birth</b> | <b># SMRT Cells Child</b> | <b># SMRT Cells Father</b> | <b># SMRT Cells Mother</b> |
|----------------|------------------------|----------------------|---------------------------|----------------------------|----------------------------|
| trio 1         | Male                   | 2003                 | 3                         | 3                          | 3                          |
| trio 3         | Male                   | 2005                 | 3                         | 3                          | 3                          |
| trio 4         | Male                   | 2014                 | 5                         | 6                          | 6                          |
| trio 8         | Male                   | 2007                 | 3                         | 3                          | 3                          |
| trio 9         | Male                   | 2016                 | 5                         | 3                          | 3                          |
| trio 10        | Female                 | 2015                 | 3                         | 3                          | 3                          |
| trio 11        | Male                   | 2004                 | 3                         | 3                          | 3                          |
| trio 14        | Male                   | 2013                 | 3                         | 3                          | 3                          |

**Table S2A: LRS statistics**

From left to right columns indicate the Trio ID, sample name, average coverage of the aligned reads, average mapping quality of aligned reads, error rate of the aligned reads computed per base, percentage of GC bases in all aligned reads, total number of reads, average length of the reads, longest read length.

| <b>Trio</b> | <b>Sample</b> | <b>Average Coverage</b> | <b>Mapping Quality</b> | <b>Error Rate</b> | <b>GC %</b> | <b>Number of Reads</b> | <b>Average Read Length</b> | <b>Longest Read Length</b> |
|-------------|---------------|-------------------------|------------------------|-------------------|-------------|------------------------|----------------------------|----------------------------|
| 1           | Child         | 30.30                   | 46.42                  | 1.34 %            | 40.39%      | 9,847,810              | 17,103                     | 49,994                     |
| 1           | Father        | 25.34                   | 46.49                  | 1.49 %            | 40.23%      | 4,680,942              | 16,420                     | 49,818                     |
| 1           | Mother        | 25.46                   | 46.48                  | 1.45 %            | 40.58%      | 5,268,160              | 18,369                     | 48,724                     |
| 2           | Child         | 29.23                   | 46.89                  | 1.44 %            | 40.55%      | 5,472,047              | 17,690                     | 50,107                     |
| 2           | Father        | 26.68                   | 46.22                  | 1.51 %            | 40.16%      | 5,852,017              | 18,280                     | 49,953                     |
| 2           | Mother        | 25.93                   | 46.31                  | 1.40 %            | 40.16%      | 5,706,913              | 17,881                     | 47,550                     |
| 3           | Child         | 27.39                   | 46.57                  | 1.51%             | 40.32%      | 4,894,816              | 17,454                     | 50,160                     |
| 3           | Father        | 26.77                   | 46.48                  | 1.50%             | 40.62%      | 5,785,153              | 17,079                     | 49,690                     |
| 3           | Mother        | 29.27                   | 46.77                  | 1.53%             | 39.98%      | 4,536,886              | 17,605                     | 49,447                     |
| 4           | Child         | 34.00                   | 46.28                  | 1.41%             | 40.50%      | 5,285,739              | 17,837                     | 50,024                     |
| 4           | Father        | 54.10                   | 46.43                  | 1.43%             | 40.50%      | 4,398,973              | 17,921                     | 47,007                     |
| 4           | Mother        | 41.50                   | 46.34                  | 1.38%             | 40.23%      | 4,801,356              | 16,509                     | 49,598                     |
| 5           | Child         | 31.29                   | 46.40                  | 1.42%             | 40.52%      | 6,017,764              | 15,118                     | 47,708                     |

|   |        |       |       |       |        |           |        |        |
|---|--------|-------|-------|-------|--------|-----------|--------|--------|
| 5 | Father | 28.15 | 46.60 | 1.55% | 40.45% | 4,828,973 | 17,193 | 53,900 |
| 5 | Mother | 38.50 | 46.59 | 1.52% | 40.57% | 5,032,396 | 16,024 | 48,280 |
| 6 | Child  | 30.30 | 46.43 | 1.41% | 40.66% | 4,924,740 | 17,301 | 48,840 |
| 6 | Father | 24.69 | 46.44 | 1.13% | 40.14% | 4,963,483 | 16,782 | 49,921 |
| 6 | Mother | 31.09 | 46.52 | 1.53% | 40.44% | 5,794,226 | 15,707 | 42,962 |
| 7 | Child  | 31.08 | 46.48 | 1.39% | 40.36% | 5,975,065 | 17,706 | 49,010 |
| 7 | Father | 34.36 | 46.69 | 1.22% | 40.62% | 7,644,820 | 16,887 | 49,953 |
| 7 | Mother | 32.79 | 46.41 | 1.33% | 40.65% | 5,576,438 | 17,468 | 49,204 |
| 8 | Child  | 27.44 | 46.57 | 1.42% | 40.59% | 5,607,329 | 15,618 | 48,843 |
| 8 | Father | 31.74 | 46.73 | 1.35% | 40.60% | 7,346,751 | 16,310 | 48,625 |
| 8 | Mother | 25.67 | 46.69 | 1.23% | 40.32% | 5,486,194 | 17,187 | 50,174 |

**Table S2B: SRS statistics**

From left to right columns indicate the Trio ID, sample name, mean coverage of the aligned reads, mapping quality of the aligned reads, total number of reads, percentage of the mapped reads.

| <b>Trio</b> | <b>Sample</b> | <b>Mean Coverage</b> | <b>Mapping Quality</b> | <b>Error rate</b> | <b>GC %</b> | <b>Number of Reads (M)</b> | <b>Mapped read %</b> |
|-------------|---------------|----------------------|------------------------|-------------------|-------------|----------------------------|----------------------|
| 1           | Child         | 54.9                 | 31.1                   | 0.97%             | 40.61%      | 1,220                      | 99.37%               |
| 1           | Father        | 65.7                 | 31.1                   | 0.98%             | 40.61%      | 1,452                      | 99.53%               |
| 1           | Mother        | 54.7                 | 30.6                   | 0.97%             | 40.56%      | 1,209                      | 99.55%               |
| 3           | Child         | 71.4                 | 31.1                   | 0.81%             | 40.79%      | 1,579                      | 99.65%               |
| 3           | Father        | 68.8                 | 31.0                   | 0.81%             | 40.82%      | 1,517                      | 99.74%               |
| 3           | Mother        | 77.9                 | 30.6                   | 0.81%             | 40.83%      | 1,719                      | 99.68%               |
| 4           | Child         | 81.8                 | 30.9                   | 0.87%             | 40.92%      | 1,827                      | 99.43%               |
| 4           | Father        | 80.7                 | 31.1                   | 0.85%             | 40.72%      | 1,797                      | 99.53%               |
| 4           | Mother        | 88.6                 | 31.0                   | 0.82%             | 40.86%      | 1,973                      | 99.49%               |
| 8           | Child         | 64.2                 | 31.4                   | 0.84%             | 40.88%      | 1,421                      | 99.62%               |
| 8           | Father        | 70.6                 | 30.8                   | 0.81%             | 40.76%      | 1,558                      | 99.69%               |
| 8           | Mother        | 75.6                 | 31.4                   | 0.81%             | 40.80%      | 1,673                      | 99.63%               |
| 9           | Child         | 90.0                 | 31.8                   | 0.82%             | 40.67%      | 1,985                      | 99.80%               |
| 9           | Father        | 103.4                | 31.7                   | 0.80%             | 40.60%      | 2,287                      | 99.78%               |
| 9           | Mother        | 70.8                 | 31.8                   | 0.79%             | 40.65%      | 1,556                      | 99.84%               |

|    |        |      |      |       |        |       |        |
|----|--------|------|------|-------|--------|-------|--------|
| 10 | Child  | 58.6 | 30.6 | 0.77% | 40.61% | 1,289 | 99.79% |
| 10 | Father | 62.5 | 31.0 | 0.81% | 40.45% | 1,377 | 99.76% |
| 10 | Mother | 50.4 | 31.1 | 0.80% | 40.51% | 1,107 | 99.76% |
| 11 | Child  | 69.5 | 30.6 | 0.76% | 40.75% | 1,527 | 99.81% |
| 11 | Father | 92.0 | 31.1 | 0.76% | 40.62% | 2,029 | 99.80% |
| 11 | Mother | 59.9 | 30.9 | 0.75% | 40.72% | 1,316 | 99.80% |
| 14 | Child  | 74.6 | 31.5 | 0.94% | 40.91% | 1,643 | 99.76% |
| 14 | Father | 65.7 | 31.2 | 1.04% | 40.95% | 1,451 | 99.67% |
| 14 | Mother | 81.5 | 31.4 | 0.97% | 40.88% | 1,797 | 99.72% |

**Table S3A: SNV Calling overview**

From left to right columns indicate the Trio ID. From second to last rows indicate total number of called substitutions by LRS, total number of called substitutions by SRS, total number of shared substitutions between LRS and SRS, total number of called substitutions unique to LRS, total number of called substitutions unique to LRS in regions not covered by SRS, total number of called substitutions unique to SRS, total number of called substitutions unique to SRS in regions not covered by LRS, number of Mendelian inheritance errors in LRS called substitutions that are shared by SRS, number of Mendelian inheritance errors in SRS called substitutions that are shared by LRS, number of Mendelian inheritance errors in called substitutions unique to LRS, number of Mendelian inheritance errors in called substitutions unique to SRS.

| <b>Trio</b>            | <b>1</b>          | <b>3</b>          | <b>4</b>          | <b>8</b>          | <b>9</b>          | <b>10</b>         | <b>11</b>         | <b>14</b>         |
|------------------------|-------------------|-------------------|-------------------|-------------------|-------------------|-------------------|-------------------|-------------------|
| Total Variants LRS     | 4,045,771         | 4,023,351         | 4,029,953         | 4,049,469         | 4,165,169         | 4,076,626         | 4,039,050         | 4,079,542         |
| Total Variants SRS     | 4,039,069         | 4,040,763         | 4,049,922         | 4,048,968         | 4,207,325         | 4,068,711         | 4,046,122         | 4,091,258         |
| Shared Variants        | 3,809,897         | 3,789,427         | 3,793,559         | 3,800,859         | 3,938,457         | 3,830,185         | 3,790,064         | 3,843,073         |
| Unique Variants LRS    | 235,874<br>(5.8%) | 233,924<br>(5.8%) | 236,394<br>(5.9%) | 248,610<br>(6.1%) | 226,712<br>(5.4%) | 246,441<br>(6.0%) | 248,986<br>(6.2%) | 236,469<br>(5.8%) |
| In No Coverage Regions | 107,733<br>(2.7%) | 106,459<br>(2.6%) | 109,222<br>(2.7%) | 118,050<br>(2.9%) | 97,543<br>(2.3%)  | 115,942<br>(2.8%) | 120,637<br>(3.0%) | 109,527<br>(2.7%) |
| Unique Variants SRS    | 229,172<br>(5.7%) | 251,336<br>(6.2%) | 256,363<br>(6.3%) | 248,109<br>(6.1%) | 268,868<br>(6.4%) | 238,526<br>(5.9%) | 256,058<br>(6.3%) | 248,185<br>(6.1%) |
| In No Coverage Regions | 90,295<br>(2.2%)  | 105,703<br>(2.6%) | 113,670<br>(2.8%) | 105,086<br>(2.6%) | 117,255<br>(2.8%) | 97,242<br>(2.4%)  | 109,526<br>(2.7%) | 107,115<br>(2.6%) |
| MIE Overlap LRS        | 1,567<br>(0.04%)  | 1,519<br>(0.04%)  | 1,550<br>(0.04%)  | 1,409<br>(0.04%)  | 1,588<br>(0.04%)  | 1,509<br>(0.04%)  | 1,864<br>(0.05%)  | 1,579<br>(0.04%)  |
| MIE Overlap SRS        | 1,090<br>(0.03%)  | 962<br>(0.03%)    | 968<br>(0.03%)    | 1,097<br>(0.03%)  | 842<br>(0.02%)    | 1,007<br>(0.03%)  | 995<br>(0.03%)    | 1,004<br>(0.03%)  |
| MIE Unique LRS         | 4,664<br>(2.0%)   | 5,027<br>(2.1%)   | 4,413<br>(1.9%)   | 4,983<br>(2.0%)   | 4,737<br>(2.1%)   | 5,108<br>(2.1%)   | 5,893<br>(2.4%)   | 4,808<br>(2.0%)   |
| MIE Unique SRS         | 524<br>(0.2%)     | 606<br>(0.2%)     | 897<br>(0.2%)     | 596<br>(0.2%)     | 671<br>(0.2%)     | 568<br>(0.2%)     | 696<br>(0.3%)     | 657<br>(0.3%)     |



**Table S3B: Indel variant calling overview**

From left to right columns indicate the Trio ID. From second to last rows indicate total number of called indels by LRS, total number of called indels by SRS, total number of shared indels between LRS and SRS, total number of called indels unique to LRS, total number of called indels unique to LRS in regions not covered by SRS, total number of called indels unique to SRS, total number of called indels unique to SRS in regions not covered by LRS, number of Mendelian inheritance errors in LRS called indels that are shared by SRS, number of Mendelian inheritance errors in SRS called indels that are shared by LRS, number of Mendelian inheritance errors in called indels unique to LRS, number of Mendelian inheritance errors in called indels unique to SRS.

| <b>Trio</b>            | <b>1</b>           | <b>3</b>           | <b>4</b>           | <b>8</b>           | <b>9</b>           | <b>10</b>          | <b>11</b>          | <b>14</b>          |
|------------------------|--------------------|--------------------|--------------------|--------------------|--------------------|--------------------|--------------------|--------------------|
| Total Variants LRS     | 1,000,831          | 1,007,910          | 994,271            | 993,683            | 1,012,085          | 1,009,160          | 1,002,073          | 1,006,835          |
| Total Variants SRS     | 909,467            | 922,787            | 923,834            | 920,711            | 945,860            | 926,296            | 928,408            | 933,328            |
| Shared Variants        | 582,158            | 582,413            | 579,927            | 581,269            | 593,085            | 588,180            | 585,104            | 590,551            |
| Unique Variants LRS    | 418,673<br>(41.8%) | 425,497<br>(42.2%) | 414,344<br>(41.7%) | 412,414<br>(41.5%) | 419,000<br>(41.4%) | 420,980<br>(41.7%) | 416,969<br>(41.6%) | 416,284<br>(41.3%) |
| In No Coverage Regions | 117,507<br>(11.7%) | 117,678<br>(11.7%) | 116,521<br>(11.7%) | 116,651<br>(11.7%) | 114,763<br>(11.3%) | 118,380<br>(11.7%) | 117,090<br>(11.7%) | 116,920<br>(11.6%) |
| Unique Variants SRS    | 327,309<br>(36.0%) | 340,374<br>(36.9%) | 343,907<br>(37.2%) | 339,442<br>(36.9%) | 352,775<br>(37.3%) | 338,116<br>(36.5%) | 343,304<br>(37.0%) | 342,777<br>(36.7%) |
| In No Coverage Regions | 89,751<br>(9.9%)   | 93,035<br>(10.1%)  | 94,111<br>(10.2%)  | 92,554<br>(10.1%)  | 95,058<br>(10.0%)  | 92,250<br>(10.0%)  | 93,570<br>(10.1%)  | 93,361<br>(10.0%)  |
| MIE Overlap LRS        | 13,633<br>(2.3%)   | 15,256<br>(2.6%)   | 12,017<br>(2.1%)   | 11,199<br>(1.9%)   | 16,049<br>(2.7%)   | 8,027<br>(1.4%)    | 11,484<br>(2.0%)   | 12,107<br>(2.1%)   |
| MIE Overlap SRS        | 19,191<br>(3.3%)   | 17,098<br>(2.9%)   | 15,164<br>(2.6%)   | 16,189<br>(2.8%)   | 17,316<br>(2.9%)   | 11,940<br>(2.0%)   | 16,923<br>(2.9%)   | 17,786<br>(3.0%)   |
| MIE Unique LRS         | 38,936<br>(9.3%)   | 43,947<br>(10.3%)  | 35,862<br>(8.7%)   | 31,336<br>(7.6%)   | 46,029<br>(11.0%)  | 34,284<br>(8.1%)   | 33,247<br>(8.0%)   | 35,325<br>(8.5%)   |
| MIE Unique SRS         | 50,211<br>(15.3%)  | 43,329<br>(12.7%)  | 40,739<br>(11.8%)  | 42,019<br>(12.4%)  | 42,986<br>(12.2%)  | 45,675<br>(13.5%)  | 43,045<br>(12.5%)  | 46,291<br>(13.5%)  |

**Table S4A: Summary of the number of identified *de novo* substitution in LRS**

From top to bottom rows indicate number of *de novo* substitutions, insertions, deletions, and the sum total of all *de novo* mutations.

|               | <b>Trio1</b> | <b>Trio3</b> | <b>Trio4</b> | <b>Trio8</b> | <b>Trio9</b> | <b>Trio10</b> | <b>Trio11</b> | <b>Trio14</b> | <b>Sum</b> | <b>Mean</b> |
|---------------|--------------|--------------|--------------|--------------|--------------|---------------|---------------|---------------|------------|-------------|
| Substitutions | 67           | 80           | 68           | 76           | 75           | 77            | 74            | 84            | <b>601</b> | <b>75.1</b> |
| Insertions    | 3            | 8            | 3            | 4            | 3            | 2             | 4             | 1             | <b>28</b>  | <b>3.5</b>  |
| Deletions     | 4            | 4            | 2            | 9            | 6            | 5             | 6             | 7             | <b>43</b>  | <b>5.4</b>  |
| Total         | 74           | 92           | 73           | 89           | 84           | 84            | 84            | 92            | <b>672</b> | <b>84</b>   |

**Table S4B: Summary of the number of identified *de novo* substitution in SRS**

From left to right rows indicate number of *de novo* substitutions, insertions, deletions, and the sum total of all *de novo* mutations by trio.

|               | <b>Trio1</b> | <b>Trio3</b> | <b>Trio4</b> | <b>Trio8</b> | <b>Trio9</b> | <b>Trio10</b> | <b>Trio11</b> | <b>Trio14</b> | <b>Sum</b> | <b>Mean</b>  |
|---------------|--------------|--------------|--------------|--------------|--------------|---------------|---------------|---------------|------------|--------------|
| Substitutions | 89           | 127          | 82           | 99           | 107          | 80            | 89            | 90            | <b>763</b> | <b>95.4</b>  |
| Insertions    | 3            | 8            | 2            | 6            | 2            | 4             | 2             | 3             | <b>30</b>  | <b>3.8</b>   |
| Deletions     | 6            | 6            | 7            | 11           | 7            | 11            | 6             | 12            | <b>66</b>  | <b>8.3</b>   |
| Total         | 98           | 141          | 91           | 116          | 116          | 95            | 97            | 105           | <b>859</b> | <b>107.4</b> |

**Table S5: All small DNMs detected by LRS**

For all small DNMs detected by LRS this table provides the genomic position, chromosomal variant, coding variant, variant group, additional variant details, quality scores (AQ and GQ), GATK score and validation status. The column cluster shows whether the small DNM was considered a clustered DNM or not (see **Methods**).

External file: Additional file 2 - Table S5.xlsx

**Table S6A: Overlap between LRS and SRS small DNMs**

From top to bottom rows indicate the total number of small *de novo* mutations detected by LRS, the total number of small SRS-detected *de novo* mutations, number of small *de novo* mutations detected by both sequencing platforms, number of LRS-detected small *de novo* mutations that are detected by only one *de novo* caller in SRS (see **Methods**) and the number of small DNMs uniquely detected by LRS.

|            | <b>Trio1</b> | <b>Trio3</b> | <b>Trio4</b> | <b>Trio8</b> | <b>Trio9</b> | <b>Trio10</b> | <b>Trio11</b> | <b>Trio14</b> | <b>Sum</b> | <b>Mean</b>  |
|------------|--------------|--------------|--------------|--------------|--------------|---------------|---------------|---------------|------------|--------------|
| Total LRS  | 74           | 92           | 73           | 89           | 84           | 84            | 84            | 92            | <b>672</b> | <b>84</b>    |
| Total SRS  | 98           | 141          | 91           | 116          | 116          | 95            | 97            | 105           | <b>859</b> | <b>107.4</b> |
| Overlap    | 66           | 73           | 63           | 83           | 73           | 69            | 73            | 83            | <b>583</b> | <b>72.9</b>  |
| LRS+       | 3            | 6            | 6            | 4            | 3            | 5             | 3             | 5             | <b>35</b>  | <b>4.4</b>   |
| LRS-unique | 5            | 13           | 4            | 2            | 8            | 10            | 8             | 4             | <b>54</b>  | <b>6.8</b>   |

**Table S6B: Overlap between SRS and LRS small DNMs**

From top to bottom rows indicate the total number of LRS-detected small *de novo* mutations, total number of SRS-detected small *de novo* mutations, number of small *de novo* mutations detected by both sequencing platforms, number of SRS small DNMs that overlap with the LRS lenient set (see **Methods**) and the number of small DNMs uniquely detected by SRS.

|            | <b>Trio1</b> | <b>Trio3</b> | <b>Trio4</b> | <b>Trio8</b> | <b>Trio9</b> | <b>Trio10</b> | <b>Trio11</b> | <b>Trio14</b> | <b>Sum</b> | <b>Mean</b>  |
|------------|--------------|--------------|--------------|--------------|--------------|---------------|---------------|---------------|------------|--------------|
| Total SRS  | 98           | 141          | 91           | 116          | 116          | 95            | 97            | 105           | <b>859</b> | <b>107.4</b> |
| Total LRS  | 74           | 92           | 73           | 89           | 84           | 84            | 84            | 92            | <b>672</b> | <b>84</b>    |
| Overlap    | 66           | 73           | 63           | 83           | 73           | 69            | 73            | 83            | <b>583</b> | <b>72.9</b>  |
| SRS+       | 16           | 15           | 20           | 24           | 32           | 11            | 14            | 11            | <b>143</b> | <b>17.9</b>  |
| SRS-unique | 16           | 53           | 8            | 9            | 11           | 15            | 10            | 11            | <b>133</b> | <b>16.6</b>  |

**Table S7: Coding small *de novo* mutations detected by LRS and SRS**

For all coding small DNMs detected by LRS and SRS, this table provides the genomic position, chromosomal variant, coding variant, variant group, additional variant details, quality scores (AQ and GQ), GATK score and validation status.

External file: Additional file 3 - Table S7.xlsx

**Table S8: All small DNMs detected by SRS**

For all small DNMs detected by SRS this table provides the genomic position, chromosomal variant, coding variant, variant group, additional variant details, quality scores (AQ and GQ), GATK score and validation status.

External file: Additional file 4 - Table S8.xlsx

**Table S9A: Validation overview LRS-unique small DNMs**

From top to bottom rows indicate the variant type. From left to right columns indicate the total number of detected small DNMs, the number of small DNMs with successful primer design, the number of confirmed small DNMs, the percentage of confirmed small DNMs.

|                         | <b>Total</b> | <b>Primer design</b> | <b>Confirmed</b> | <b>% Confirmed</b> |
|-------------------------|--------------|----------------------|------------------|--------------------|
| LRS-unique              | 54           | 27                   | 11               | 20.3%              |
| LRS-unique substitution | 28           | 13                   | 11               | 39.3%              |
| LRS-unique insertion    | 17           | 10                   | 0                | 0%                 |
| LRS-unique deletion     | 9            | 4                    | 0                | 0%                 |

**Table S9B: Validation overview SRS-unique small DNMs**

From top to bottom rows indicate the variant type. From left to right columns indicate the total number of detected small DNMs, the number of small DNMs with successful primer design, the number of confirmed small DNMs, the percentage of confirmed small DNMs.

|                         | <b>Total</b> | <b>Selected</b> | <b>Confirmed</b> | <b>% Confirmed</b> |
|-------------------------|--------------|-----------------|------------------|--------------------|
| SRS-unique              | 133          | 42              | 8                | 6.0%               |
| SRS-unique substitution | 93           | 34              | 7                | 7.5%               |
| SRS-unique insertion    | 12           | 2               | 0                | 0%                 |
| SRS-unique deletion     | 28           | 6               | 1                | 3.6%               |

**Table S10: LRS-unique small DNMs**

Overview of the LRS-unique small DNMs and the reasoning why these small DNMs were not detected by SRS. For each of the 11 DNMs this table shows the allele quality (AQ) reflecting the quality of the alternate allele, genotype quality (GQ) reflecting the quality of the genotype, but also whether the mutation is located in a repeated region of the genome, whether is well covered in both LRS and SRS, and whether it was called in SRS. Finally the table presents the reason why the DNM was not in the overlap set. Called potentially maternally or paternally inherited means that due to a small number of alternative reads in the respective parent, the mutation was not called *de novo* in SRS, but was marked potentially inherited. Low quality *de novo* mutation means that for one of the parents there was a small number of alternative reads at the position of the DNM.

| Trio | Position (GRCh38)         | AQ | GQ | Repeat region? | Well covered in LRS? | Well covered in SRS?         | Called in SRS? | Reason why not in overlap                     |
|------|---------------------------|----|----|----------------|----------------------|------------------------------|----------------|-----------------------------------------------|
| 1    | chr1:198079019-198079019  | 54 | 54 | No             | Yes                  | Yes                          | Yes            | Called as potentially maternally inherited    |
| 3    | chr16:52469597-52469597   | 56 | 56 | No             | Yes                  | Yes                          | Yes            | Called as potentially maternally inherited    |
| 4    | chr7:115997201-115997201  | 58 | 58 | Yes            | Yes                  | Yes                          | Yes            | Called as potentially paternally inherited    |
| 4    | chr11:46576054-46576054   | 57 | 58 | No             | Yes                  | Yes                          | Yes            | Called as potentially paternally inherited    |
| 10   | chr5:64759449-64759449    | 57 | 58 | No             | Yes                  | Yes                          | Yes            | Called as potentially maternally inherited    |
| 10   | chr6:97491419-97491419    | 60 | 60 | Yes            | Yes                  | Yes                          | Yes            | Called as potentially maternally inherited    |
| 10   | chr11:132965130-132965130 | 67 | 67 | Yes            | Yes                  | Yes                          | Yes            | Called as potentially maternally inherited    |
| 10   | chr15:37884087-37884087   | 52 | 52 | Yes            | Yes                  | Yes                          | Yes            | Called as potentially maternally inherited    |
| 14   | chr6:166597462-166597462  | 46 | 46 | Yes            | Yes                  | Yes                          | Yes            | Called as potentially maternally inherited    |
| 14   | chr10:131290026-131290026 | 45 | 31 | No             | Yes                  | Yes, but low mapping quality | Yes            | Called as low quality <i>de novo</i> mutation |
| 14   | chr18:75551066-75551066   | 58 | 58 | No             | Yes                  | Yes                          | Yes            | Called as potentially paternally inherited    |



**Table S11: SRS-unique small DNMs**

Overview of the SRS-unique small DNMs and the reasoning why these small DNMs were not detected by LRS. For each of the eight DNMs this table shows the GATK sequencing score and whether the DNM was located in a repeated region of the genome. Additionally, the table shows whether the DNM was well covered in both SRS and LRS. Finally the table indicates whether the DNM was called in LRS and the reason why it was not called (*de novo*) in LRS. The reasoning in the last column refers back to the *de novo* mutation filtering criteria we applied to the LRS data (see **Methods**).

| Trio | Position (GRCh38)        | GATK score | Repeat region? | Well covered in SRS? | Well covered in LRS? | Called in LRS? | Reason why not called ( <i>de novo</i> ) in LRS                                |
|------|--------------------------|------------|----------------|----------------------|----------------------|----------------|--------------------------------------------------------------------------------|
| 1    | chr1:166916439-166916439 | 769.77     | No             | Yes                  | Yes                  | Yes            | Insufficient genotype quality for mother                                       |
| 1    | chr5:39982266-39982266   | 1179.77    | No             | Yes                  | Yes                  | Yes            | Alternative allele depth is 3 in father                                        |
| 1    | chr20:62301762-62301762  | 995.77     | Yes            | Yes                  | Yes                  | Yes            | Insufficient genotype quality for father                                       |
| 3    | chr19:872379-872379      | 996.77     | No             | Yes                  | No                   | No             | Insufficient coverage                                                          |
| 4    | chr10:43125792-43125792  | 1359.77    | No             | Yes                  | Yes                  | Yes            | No genotype for father                                                         |
| 4    | chr18:10449641-10449641  | 1065.77    | No             | Yes                  | Yes                  | Yes            | No genotype for mother                                                         |
| 10   | chr6:78918297-78918297   | 153.73     | Yes            | Yes                  | Yes                  | Yes            | Alternative allele depth mother is 4 and variant allele frequency proband <20% |
| 10   | chr20:37038456-37038456  | 368.77     | Yes            | Yes                  | Yes                  | No             | Alternative allele depth is 3 in proband                                       |

**Table S12A: STRs in LRS data**

Overview of the number of STR loci that have been genotyped for each sample. In addition, the number of completely genotyped STR loci are shown. Finally this table shows the number of repeat loci for which one or both alleles in the child was  $\geq 2$  repeat units longer or shorter than the number of repeat units in both parents and how many of these fall in an NDD gene.

| Sample | STRs genotyped | STRs genotyped for entire trio | Number of STR loci with <i>de novo</i> length | Number of high quality candidate <i>de novo</i> STRs |
|--------|----------------|--------------------------------|-----------------------------------------------|------------------------------------------------------|
| child  | 171,101        | 171,043                        | 119                                           | 4                                                    |
| father | 171,082        |                                |                                               |                                                      |
| mother | 171,095        |                                |                                               |                                                      |
| child  | 171,103        | 171,042                        | 110                                           | 3                                                    |
| father | 171,094        |                                |                                               |                                                      |
| mother | 171,087        |                                |                                               |                                                      |
| child  | 171,031        | 170,979                        | 115                                           | 6                                                    |
| father | 171,087        |                                |                                               |                                                      |
| mother | 171,105        |                                |                                               |                                                      |
| child  | 171,076        | 171,037                        | 85                                            | 6                                                    |
| father | 171,081        |                                |                                               |                                                      |
| mother | 171,103        |                                |                                               |                                                      |
| child  | 171,104        | 171,049                        | 86                                            | 1                                                    |
| father | 171,103        |                                |                                               |                                                      |
| mother | 171,101        |                                |                                               |                                                      |
| child  | 171,111        | 171,056                        | 86                                            | 1                                                    |
| father | 171,095        |                                |                                               |                                                      |
| mother | 171,093        |                                |                                               |                                                      |
| child  | 171,099        | 171,055                        | 141                                           | 1                                                    |
| father | 171,099        |                                |                                               |                                                      |
| mother | 171,101        |                                |                                               |                                                      |
| child  | 171,094        | 171,042                        | 107                                           | 6                                                    |
| father | 171,087        |                                |                                               |                                                      |
| mother | 171,096        |                                |                                               |                                                      |

**Table S12B: STRs in SRS data**

Overview of the number of STR loci that have been genotyped for each sample. In addition, the number of completely genotyped STR loci are shown. Finally this table shows the number of repeat loci for which one or both alleles in the child was  $\geq 2$  repeat units longer or shorter than the number of repeat units in both parents and how many of these fall in an NDD gene.

| Sample | STRs genotyped | STRs genotyped for entire trio | Number of STR loci with <i>de novo</i> length | Number of high quality candidate <i>de novo</i> STRs |
|--------|----------------|--------------------------------|-----------------------------------------------|------------------------------------------------------|
| child  | 171,131        | 171,109                        | 283                                           | 26                                                   |
| father | 171,138        |                                |                                               |                                                      |
| mother | 171,122        |                                |                                               |                                                      |
| child  | 171,137        | 171,122                        | 249                                           | 19                                                   |
| father | 171,137        |                                |                                               |                                                      |
| mother | 171,134        |                                |                                               |                                                      |
| child  | 171,134        | 171,121                        | 268                                           | 31                                                   |
| father | 171,134        |                                |                                               |                                                      |
| mother | 171,134        |                                |                                               |                                                      |
| child  | 171,121        | 171,109                        | 268                                           | 12                                                   |
| father | 171,122        |                                |                                               |                                                      |
| mother | 171,132        |                                |                                               |                                                      |
| child  | 171,133        | 171,112                        | 124                                           | 5                                                    |
| father | 171,131        |                                |                                               |                                                      |
| mother | 171,129        |                                |                                               |                                                      |
| child  | 171,135        | 171,112                        | 158                                           | 9                                                    |
| father | 171,131        |                                |                                               |                                                      |
| mother | 171,123        |                                |                                               |                                                      |
| child  | 171,130        | 171,109                        | 247                                           | 14                                                   |
| father | 171,137        |                                |                                               |                                                      |
| mother | 171,125        |                                |                                               |                                                      |
| child  | 171,126        | 171,113                        | 225                                           | 10                                                   |
| father | 171,135        |                                |                                               |                                                      |
| mother | 171,113        |                                |                                               |                                                      |

**Table S13: Overview of all high quality *de novo* STRs in LRS**

From left to right columns indicate trio number, genomic start position of the STR, variant group, number of repeat units in GRCh38/Hg38 reference genome, number of repeat units of both allele for patient, father and mother, TRGT quality score of both alleles for patient, father and mother and finally the validation result.

External file: Additional file 5 - Table S13.xlsx

**Table S14: Overview of all high quality *de novo* STRs in SRS**

From left to right columns indicate trio number, genomic start position of the STR, variant group, number of repeat units in GRCh38/Hg38 reference genome, number of repeat units of both alleles for patient, father and mother, ExpansionHunter confidence intervals for both alleles of the patient and finally the validation result.

External file: Additional file 6 - Table S14.xlsx

**Table S15: Overlap between LRS and SRS for *de novo* STRs**

From top to bottom rows indicate by which technologies the STR was called. If STRs were called by both technologies these are listed in the bottom row. The columns indicate the trio in which the STR was detected as well as the sum of all called *de novo* STRs and the mean.

|         | Trio1 | Trio3 | Trio4 | Trio8 | Trio9 | Trio10 | Trio11 | Trio14 | Sum        | Mean        |
|---------|-------|-------|-------|-------|-------|--------|--------|--------|------------|-------------|
| LRS     | 4     | 3     | 6     | 6     | 1     | 1      | 1      | 6      | <b>28</b>  | <b>3.5</b>  |
| SRS     | 26    | 19    | 31    | 12    | 5     | 9      | 14     | 10     | <b>126</b> | <b>15.8</b> |
| Overlap | 0     | 1     | 0     | 0     | 0     | 0      | 0      | 0      | <b>1</b>   | <b>0.1</b>  |

**Table S16: Validation overview for LRS-unique and SRS-unique *de novo* STRs**

Rows indicate to which of the two technologies the unique variants belong. The columns indicate the total number of high-quality *de novo* STR expansions and contractions, the number of selected STRs and the validation results in false positives, inherited variants and confirmed variants.

|            | <b>Total</b> | <b>Attempted</b> | <b>False positive</b> | <b>Inherited</b> | <b>Confirmed</b> | <b>% Confirmed</b> |
|------------|--------------|------------------|-----------------------|------------------|------------------|--------------------|
| LRS-unique | 27           | 18               | 14                    | 4                | 0                | 0%                 |
| SRS-unique | 125          | 18               | 13                    | 5                | 0                | 0%                 |

**Table S17: Overview of SVs in LRS and SRS**

From left to right columns indicate Trio ID, genomic position in HGVS format, structural variant type, length of the structural variant, genic region that structural variant is located (if any).

\*indicates the SV that was detected by both LRS and SRS.

External file: Additional file 7 - Table S17.xlsx



**Table S18: Effect of coverage on DNM detection**

From left to right columns indicate Trio ID, number of *de novo* mutations detected at 10x, number of *de novo* mutations that overlap between 10x and the truth set, percentage of small DNMs that overlap between 10x and truth set, number of *de novo* mutations detected at 20x, number of *de novo* mutations that overlap between 20x and truth set, percentage of small DNMs that overlap between 20x and the truth set.

| <b>Trio</b> | <b>10x</b> | <b>10x<br/>Overlap</b> | <b>10x<br/>Sensitivity %</b> | <b>20x</b> | <b>20x<br/>Overlap</b> | <b>20x<br/>Sensitivity %</b> | <b>Truth<br/>set</b> |
|-------------|------------|------------------------|------------------------------|------------|------------------------|------------------------------|----------------------|
| 1           | 1158       | 22                     | 32.84%                       | 340        | 61                     | 91.04%                       | 67                   |
| 3           | 1163       | 34                     | 45.33%                       | 319        | 67                     | 89.33%                       | 74                   |
| 4           | 969        | 27                     | 41.54%                       | 300        | 56                     | 86.15%                       | 65                   |
| 8           | 888        | 54                     | 65.06%                       | 213        | 77                     | 92.77%                       | 83                   |
| 9           | 1648       | 46                     | 63.01%                       | 228        | 71                     | 97.26%                       | 73                   |
| 10          | 1395       | 33                     | 45.21%                       | 274        | 64                     | 87.67%                       | 73                   |
| 11          | 1486       | 43                     | 58.90%                       | 322        | 71                     | 97.26%                       | 73                   |
| 14          | 973        | 44                     | 51.16%                       | 210        | 75                     | 87.21%                       | 86                   |

**Table S19A: Phasing of LRS detected DNMs and parental age**

From left to right columns indicate the Trio ID, total number of *de novo* mutations in the proband, number of phased *de novo* mutations by Whatshap, number of *de novo* mutations phased as paternal, number of *de novo* mutations phased as maternal, percentage of the phased *de novo* mutations, paternal age of the trio, maternal age of the trio.

| <b>Trio</b>  | <b># small DNMs</b> | <b>Phased DNMs</b> | <b>Paternal</b> | <b>Maternal</b> | <b>% Phased</b> | <b>Paternal / Maternal Age</b> |
|--------------|---------------------|--------------------|-----------------|-----------------|-----------------|--------------------------------|
| 1            | 74                  | 72 (97%)           | 52              | 20              | 97.30           | 31 / 38                        |
| 3            | 92                  | 86 (94%)           | 64              | 22              | 93.48           | 43 / 41                        |
| 4            | 73                  | 70 (96%)           | 53              | 17              | 95.89           | 32 / 26                        |
| 8            | 89                  | 85 (96%)           | 69              | 16              | 95.51           | 36 / 37                        |
| 9            | 84                  | 80 (95%)           | 50              | 30              | 95.25           | 37 / 39                        |
| 10           | 84                  | 81 (96%)           | 60              | 21              | 96.43           | 35 / 29                        |
| 11           | 84                  | 80 (95%)           | 63              | 17              | 95.24           | 51 / 43                        |
| 14           | 92                  | 88 (96%)           | 75              | 13              | 95.65           | 34 / 24                        |
| <b>Total</b> | <b>672</b>          | <b>642 (96%)</b>   | <b>486</b>      | <b>156</b>      | <b>95.53</b>    | <b>NA</b>                      |

**Table S19B: Phasing of SRS detected DNMs**

From left to right columns indicate the Trio ID, total number of *de novo* mutations in the proband, number of phased *de novo* mutations by Whatsmap, number of *de novo* mutations phased as paternal, number of *de novo* mutations phased as maternal, number of *de novo* mutations failed to be phased parentally, percentage of *de novo* mutations that are phased parentally.

| <b>Trio</b>  | <b># small DNMS</b> | <b>Phased DNMs</b> | <b>Paternal</b> | <b>Maternal</b> | <b>Unknown</b> | <b>% phased</b> | <b>Paternal / Maternal Age</b> |
|--------------|---------------------|--------------------|-----------------|-----------------|----------------|-----------------|--------------------------------|
| 1            | 98                  | 50 (51%)           | 18              | 8               | 24             | 26.53%          | 31 / 38                        |
| 3            | 141                 | 67 (48%)           | 20              | 4               | 43             | 17.02%          | 43 / 41                        |
| 4            | 91                  | 48 (53%)           | 17              | 4               | 27             | 23.07%          | 32 / 26                        |
| 8            | 116                 | 45 (39%)           | 17              | 5               | 23             | 18.96%          | 36 / 37                        |
| 9            | 116                 | 58 (50%)           | 25              | 8               | 25             | 28.44%          | 37 / 39                        |
| 10           | 95                  | 34 (36%)           | 10              | 5               | 19             | 15.78%          | 35 / 29                        |
| 11           | 97                  | 44 (45%)           | 11              | 1               | 32             | 12.37%          | 51 / 43                        |
| 14           | 105                 | 41 (39%)           | 16              | 2               | 23             | 17.14%          | 34 / 24                        |
| <b>Total</b> | <b>859</b>          | <b>387 (45%)</b>   | <b>134</b>      | <b>37</b>       | <b>216</b>     | <b>20.02%</b>   | <b>NA</b>                      |

**Table S20: Phasing details of small DNMs detected by both LRS and SRS**

For all small DNMs that were phased by both LRS and SRS this table provides the genomic position, additional variant details and phasing details including the genotype, haplotype, and paternal and maternal counts for both LRS and SRS.

External file: Additional file 8 - Table S20.xlsx

**Table S21: Phasing details of small DNMs uniquely detected by LRS**

For small DNMs that were detected uniquely by both LRS, this table provides the genomic position, validation and phasing status.

| <b>Trio</b> | <b>Position</b>           | <b>Validation Status</b> | <b>Phasing Status</b> |
|-------------|---------------------------|--------------------------|-----------------------|
| 1           | chr1:198079019-198079019  | True <i>de novo</i>      | Maternal              |
| 3           | chr16:52469597-52469597   | True <i>de novo</i>      | Maternal              |
| 4           | chr7:115997201-115997201  | True <i>de novo</i>      | Paternal              |
| 4           | chr11:46576054-46576054   | True <i>de novo</i>      | Paternal              |
| 10          | chr5:64759449-64759449    | True <i>de novo</i>      | Maternal              |
| 10          | chr6:97491419-97491419    | True <i>de novo</i>      | Maternal              |
| 10          | chr11:132965130-132965130 | True <i>de novo</i>      | Maternal              |
| 10          | chr15:37884087-37884087   | True <i>de novo</i>      | Maternal              |
| 14          | chr6:166597462-166597462  | True <i>de novo</i>      | Maternal              |
| 14          | chr10:131290026-131290026 | True <i>de novo</i>      | Paternal              |
| 14          | chr18:75551066-75551066   | True <i>de novo</i>      | Paternal              |
| 3           | chr4:121944414-121944414  | No variant               | Maternal              |
| 3           | chr5:114373640-114373640  | No variant               | Unknown               |
| 3           | chr7:125225466-125225466  | Inherited                | Unknown               |
| 3           | chr11:26235002-26235002   | Inherited                | Unknown               |
| 4           | chr2:134443265-134443265  | Inherited                | Unknown               |
| 4           | chr2:216636925-216636925  | No variant               | Unknown               |
| 8           | chr2:22739501-22739501    | Inherited                | Unknown               |
| 8           | chr12:93478936-93478938   | Inherited                | Unknown               |
| 9           | chr3:29779706-29779706    | Inherited                | Unknown               |
| 10          | chr1:60735436-60735440    | Inherited                | Unknown               |
| 11          | chr1:239304289-239304289  | No variant               | Maternal              |
| 11          | chr2:81167641-81167641    | Inherited                | Unknown               |
| 11          | chr5:85362386-85362386    | No variant               | Paternal              |
| 11          | chr7:157478544-157478544  | Inherited                | Unknown               |
| 11          | chr11:115288462-115288463 | Inherited                | Unknown               |
| 11          | chr17:3965846-3965846     | Inherited                | Unknown               |
